# Supplementary material
Source: Springer Nature journal article supplement (https://www.springermedizin.de/resource/supplementary/12891_2011_1533_MOESM1_ESM.pdf/9508022)

Figure 1. Flow Chart Depicting the Inclusion and Exclusion Criteria.

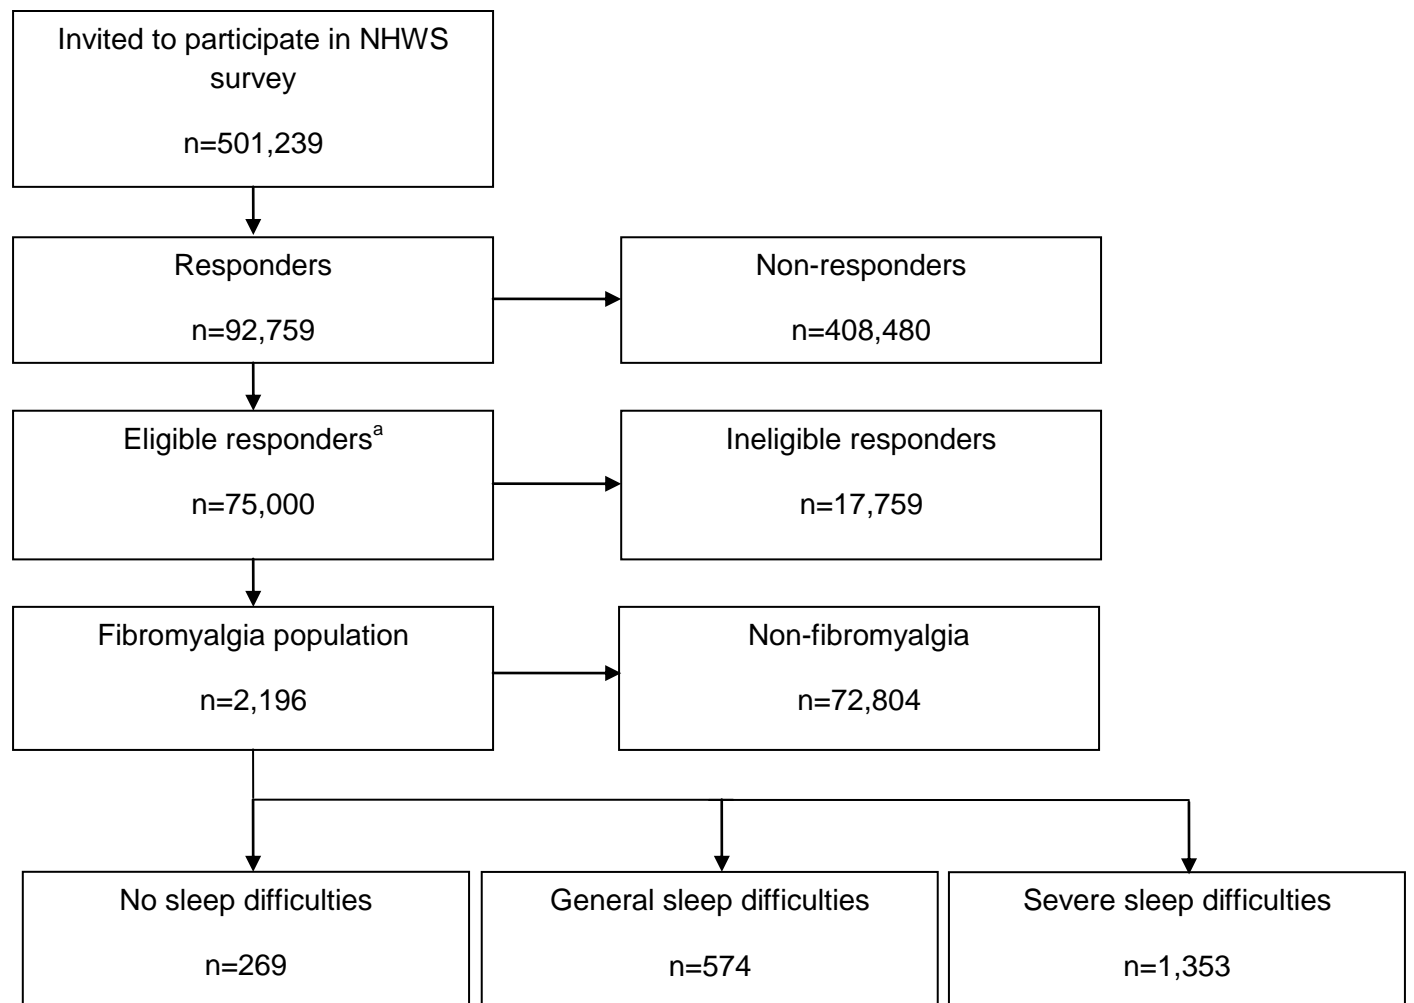

Supplement: MOESM1 [file 9508022]
